# Supplementary material for: Psychometric validation of the Spanish version of the Expanded Prostate Cancer Index Composite-26
Source: Springer Nature journal article supplement (doi:10.1007/s00345-023-04691-7), 2023-11-10
Supplement: MOESM1 [file 26290398]

**Psychometric validation of the Spanish version of the Expanded Prostate cancer  
Index Composite-26**

**World Journal of Urology**

Víctor Zamora MPH<sup>1,2,3</sup>, Olatz Garin PhD<sup>1,3,4\*</sup>, José Francisco Suárez MD<sup>5</sup>, Josep Jové MD<sup>6</sup>, Manuel Castells MD<sup>5</sup>, Ferran Ferrer MD<sup>7</sup>, Cristina Gutiérrez PhD<sup>7</sup>, Ferran Guedea PhD<sup>7</sup>, Ana Boladeras MD<sup>7</sup>, Lluís Fumadó PhD<sup>8</sup>, Alvar Roselló MD<sup>9</sup>, Jorge Pastor MD<sup>10</sup>, Pilar Samper PhD<sup>11</sup>, Àngels Pont MSc<sup>1,3</sup>, Montse Ferrer PhD<sup>1,3,4\*</sup>

1 Health Services Research Group, Hospital del Mar Research Institute, Barcelona, Spain.

2 Universitat Autònoma de Barcelona (UAB), Bellaterra, Spain.

3 CIBER en Epidemiología y Salud Pública, CIBERESP, Spain.

4 Universitat Pompeu Fabra, Barcelona, Spain.

5 Urology Department, Hospital Universitari de Bellvitge, L'Hospitalet de Llobregat, Spain.

6 Radiation Oncology Department, Institut Català d'Oncologia, Badalona, Spain.

7 Radiation Oncology Department, Institut Català d'Oncologia, L'Hospitalet de Llobregat, Spain.

8 Urology Department, Hospital del Mar, Barcelona, Spain.

9 Radiation Oncology Department, Institut Català d'Oncologia, Girona, Spain.

10 Radiation Oncology Department, ASCIRES GRUPO BIOMÉDICO, Valencia, Spain.

11 Radiation Oncology Department, Hospital Universitario Rey Juan Carlos, Móstoles, Spain

**Contact information for corresponding authors**

\*Olatz Garin and Montse Ferrer, PhD,

e-mail address: [ogarin@imim.es](mailto:ogarin@imim.es); [mferrer@imim.es](mailto:mferrer@imim.es)

**Supplementary Table 1. Absolute and relative frequencies of EPIC-26 response options at 12 months after treatment (n=543).**

| EPIC-26                               |             | Response options, n (%) |            |             |             |  |
|---------------------------------------|-------------|-------------------------|------------|-------------|-------------|--|
| Items, n (%)                          | The Best    |                         |            |             | The Worst   |  |
| <b>Urinary incontinence</b>           |             |                         |            |             |             |  |
| 1. Leaking                            | 311 (57.3%) | 95 (17.5%)              | 54 (9.9%)  | 31 (5.7%)   | 52 (9.6%)   |  |
| 2. Dribbling                          | 295 (54.3%) | 148 (27.3%)             | 95 (17.5%) | 5 (0.9%)    | ---         |  |
| 3. Pad use*                           | 455 (83.8%) | 57 (10.5%)              | 20 (3.7%)  | 11 (2.0%)   | ---         |  |
| 4a. Leaking problem*                  | 294 (54.1%) | 5 (0.9%)                | 57 (10.5%) | 95 (17.5%)  | 92 (16.9%)  |  |
| <b>Urinary Irritative/Obstructive</b> |             |                         |            |             |             |  |
| 4b. Dysuria*                          | 462 (85.1%) | 1 (0.2%)                | 32 (5.9%)  | 30 (5.5%)   | 18 (3.3%)   |  |
| 4c. Hematuria*                        | 535 (98.5%) | 0 (0.0%)                | 0 (0.0%)   | 0 (0.0%)    | 8 (1.5%)    |  |
| 4d. Weak stream*                      | 362 (66.7%) | 2 (0.4%)                | 43 (7.9%)  | 70 (12.9%)  | 66 (12.2%)  |  |
| 4e. Frequency*                        | 267 (49.2%) | 1 (0.2%)                | 53 (9.8%)  | 127 (23.4%) | 95 (17.5%)  |  |
| 5. Overall urinary problem*           | 194 (35.7%) | 1 (0.2%)                | 87 (16.0%) | 148 (27.3%) | 113 (20.8%) |  |
| <b>Bowel</b>                          |             |                         |            |             |             |  |
| 6a. Urgency*                          | 486 (89.5%) | 0 (0.0%)                | 11 (2.0%)  | 27 (5.0%)   | 19 (3.5%)   |  |
| 6b. Frequency*                        | 462 (85.1%) | 0 (0.0%)                | 13 (2.4%)  | 42 (7.7%)   | 26 (4.8%)   |  |
| 6c. Fecal incontinence*               | 480 (88.4%) | 0 (0.0%)                | 2 (0.4%)   | 20 (3.7%)   | 41 (7.6%)   |  |
| 6d. Bloody stools*                    | 492 (90.6%) | 0 (0.0%)                | 15 (2.8%)  | 19 (3.5%)   | 17 (3.1%)   |  |
| 6e. Rectal pain*                      | 474 (87.3%) | 0 (0.0%)                | 13 (2.4%)  | 39 (7.2%)   | 17 (3.1%)   |  |
| 7. Overall bowel problem*             | 372 (68.5%) | 0 (0.0%)                | 40 (7.4%)  | 79 (14.5%)  | 52 (9.6%)   |  |
| <b>Sexual</b>                         |             |                         |            |             |             |  |
| 8a. Poor erections                    | 0 (0.0%)    | 99 (18.2%)              | 59 (10.9%) | 83 (15.3%)  | 302 (55.6%) |  |
| 8b. Difficulty with orgasm            | 2 (0.4%)    | 128 (23.6%)             | 74 (13.6%) | 44 (8.1%)   | 295 (54.3%) |  |
| 9. Erection not firm                  | 123 (22.7%) | 87 (16.0%)              | 64 (11.8%) | 269 (49.5%) | ---         |  |
| 10. Erections frequency               | 86 (15.8%)  | 47 (8.7%)               | 61 (11.2%) | 24 (4.4%)   | 325 (59.9%) |  |
| 11. Poor sexual function              | 0 (0.0%)    | 89 (16.4%)              | 63 (11.6%) | 58 (10.7%)  | 333 (61.3%) |  |
| 12. Overall sexual problem*           | 355 (65.4%) | 0 (0.0%)                | 31 (5.7%)  | 86 (15.8%)  | 71 (13.1%)  |  |
| <b>Hormonal</b>                       |             |                         |            |             |             |  |
| 13a. Hot flashes*                     | 384 (70.7%) | 0 (0.0%)                | 20 (3.7%)  | 46 (8.5%)   | 93 (17.1%)  |  |
| 13b. Breast problems*                 | 437 (80.5%) | 4 (0.7%)                | 54 (9.9%)  | 38 (7.0%)   | 10 (1.8%)   |  |
| 13c. Depression*                      | 312 (57.5%) | 1 (0.2%)                | 29 (5.3%)  | 82 (15.1%)  | 119 (21.9%) |  |
| 13d. Lack of energy*                  | 307 (56.5%) | 0 (0.0%)                | 25 (4.6%)  | 78 (14.4%)  | 133 (24.5%) |  |
| 13e. Weight change*                   | 415 (76.4%) | 2 (0.4%)                | 31 (5.7%)  | 51 (9.4%)   | 44 (8.1%)   |  |

*\*The direction of these items is opposite (lower scores mean better outcomes)*
