# Supplementary material for: Psychometric validation of the Spanish version of the Expanded Prostate Cancer Index Composite-26
Source: Springer Nature journal article supplement (doi:10.1007/s00345-023-04691-7), 2023-11-10
Supplement: MOESM2 [file 26290398]

**Psychometric validation of the Spanish version of the Expanded Prostate cancer  
Index Composite-26**

**World Journal of Urology**

Víctor Zamora MPH<sup>1,2,3</sup>, Olatz Garin PhD<sup>1,3,4\*</sup>, José Francisco Suárez MD<sup>5</sup>, Josep Jové MD<sup>6</sup>, Manuel Castells MD<sup>5</sup>, Ferran Ferrer MD<sup>7</sup>, Cristina Gutiérrez PhD<sup>7</sup>, Ferran Guedea PhD<sup>7</sup>, Ana Boladeras MD<sup>7</sup>, Lluís Fumadó PhD<sup>8</sup>, Alvar Roselló MD<sup>9</sup>, Jorge Pastor MD<sup>10</sup>, Pilar Samper PhD<sup>11</sup>, Àngels Pont MSc<sup>1,3</sup>, Montse Ferrer PhD<sup>1,3,4\*</sup>

1 Health Services Research Group, Hospital del Mar Research Institute, Barcelona, Spain.

2 Universitat Autònoma de Barcelona (UAB), Bellaterra, Spain.

3 CIBER en Epidemiología y Salud Pública, CIBERESP, Spain.

4 Universitat Pompeu Fabra, Barcelona, Spain.

5 Urology Department, Hospital Universitari de Bellvitge, L'Hospitalet de Llobregat, Spain.

6 Radiation Oncology Department, Institut Català d'Oncologia, Badalona, Spain.

7 Radiation Oncology Department, Institut Català d'Oncologia, L'Hospitalet de Llobregat, Spain.

8 Urology Department, Hospital del Mar, Barcelona, Spain.

9 Radiation Oncology Department, Institut Català d'Oncologia, Girona, Spain.

10 Radiation Oncology Department, ASCIRES GRUPO BIOMÉDICO, Valencia, Spain.

11 Radiation Oncology Department, Hospital Universitario Rey Juan Carlos, Móstoles, Spain

**Contact information for corresponding authors**

\*Olatz Garin and Montse Ferrer, PhD,

e-mail address: [ogarin@imim.es](mailto:ogarin@imim.es); [mferrer@imim.es](mailto:mferrer@imim.es)

Supplementary Figure 1. Assessment of criterion validity between each domain of the EPIC-50 and the same domain in EPIC-26 [Intraclass Correlation Coefficient (ICC)], in 324 patients recruited between January 2017 and November 2019.

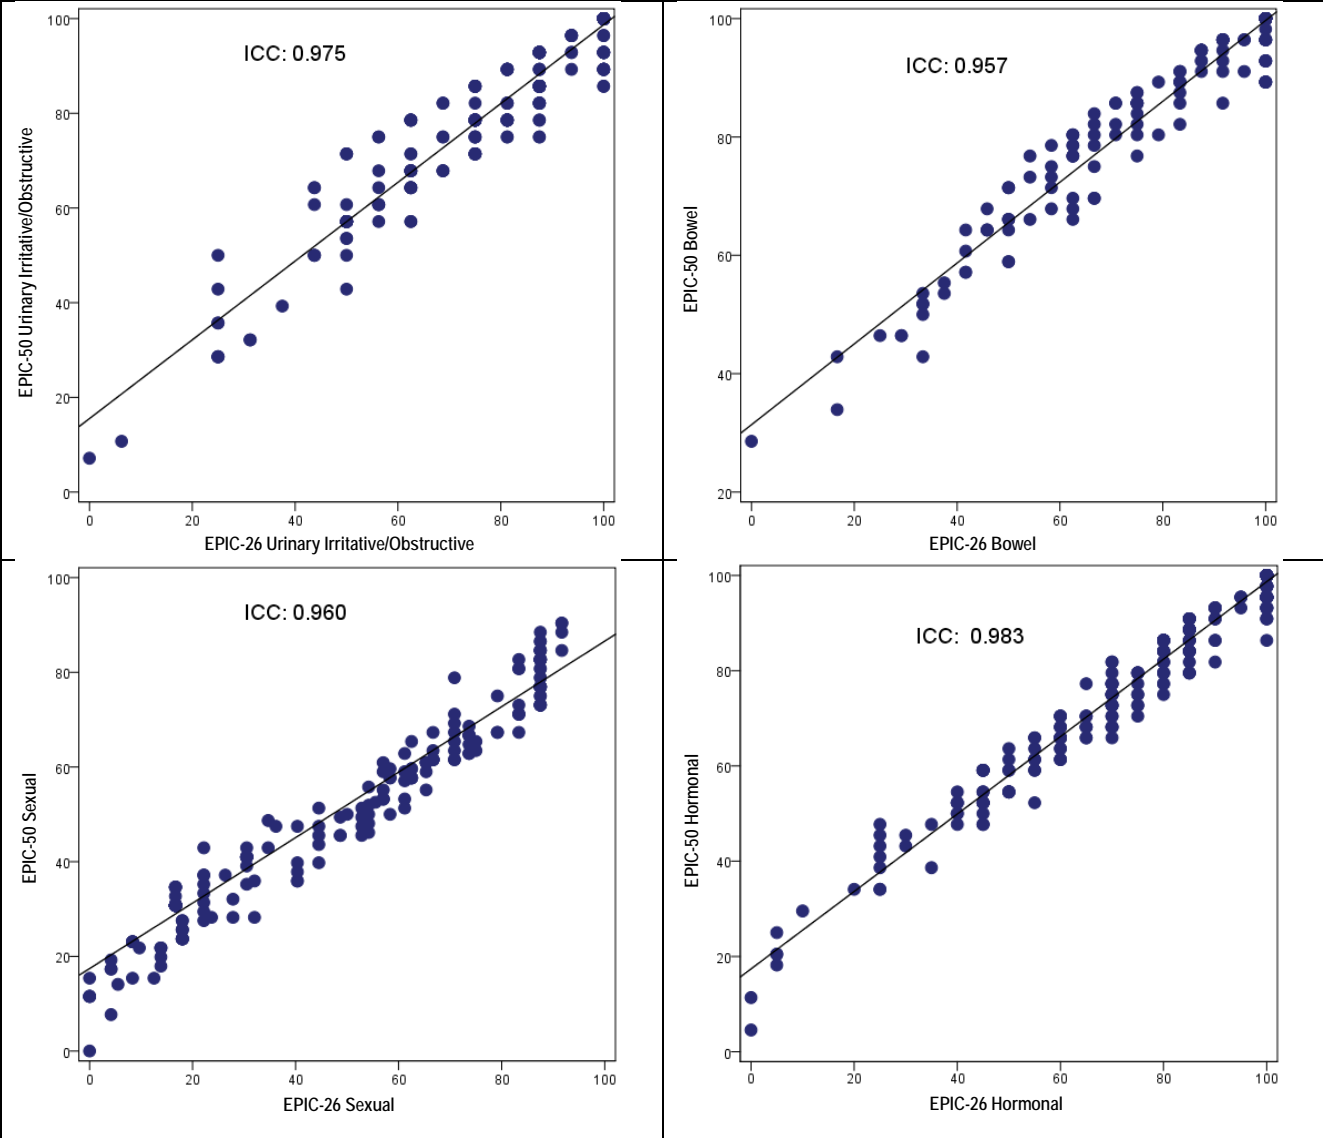

Footnote: Urinary Incontinence was not represented because the four items from both EPIC versions are equal.
